# Supplementary material for: SNAP-tagging live cells via chelation-assisted copper-catalyzed azide–alkyne cycloaddition
Source: Royal Society of Chemistry journal article supplement (doi:10.1039/d3ob01003a), 2023-01-01
Supplement: d3ob01003a1.pdf [file d3ob01003a1.pdf]

## SNAP-tagging Live Cells via Chelation-Assisted Copper-Catalyzed Azide-Alkyne Cycloaddition

Daniel J. Stone,<sup>1</sup> Miguel Macias-Contreras,<sup>1</sup> Shaun M. Crist,<sup>1</sup> Christelle F. T. Bucag,<sup>1</sup> Gwimoon Seo,<sup>2</sup> and  
Lei Zhu<sup>1,\*</sup>

1. Department of Chemistry and Biochemistry, Florida State University, 95 Chieftan Way, Tallahassee, FL  
32306-4390, USA

2. Institute of Molecular Biophysics, Florida State University, 91 Chieftan Way, Tallahassee, FL 32306-  
4380, USA

[lzhu@fsu.edu](mailto:lzhu@fsu.edu)

## Supporting Information

### Table of Contents

|                                                                                   |     |
|-----------------------------------------------------------------------------------|-----|
| <b>1. Additional structure</b>                                                    | S2  |
| <b>2. ESI-MS-TOF spectra</b>                                                      | S2  |
| <b>3. SDS-PAGE</b>                                                                | S4  |
| <b>4. Additional images</b>                                                       | S5  |
| <b>5. Copies of <sup>1</sup>H and <sup>13</sup>C NMR spectra of new compounds</b> | S11 |

## 1. Additional structure

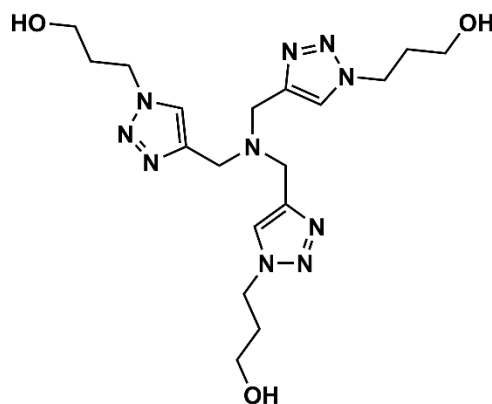

**Fig. S1** Chemical structure of THPTA (tris(3-hydroxypropyltriazolylmethyl)amine), the copper-binding ligand used in this work.

## 2. ESI-MS-TOF spectra

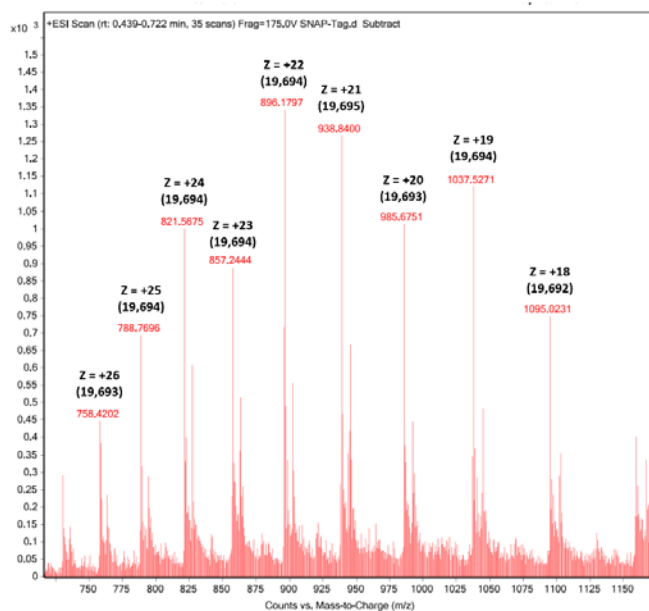

**Fig. S2** ESI-TOF-MS spectrum of SNAP-tag protein (purchased from NEB). The charge (Z) is listed above each m/z peak, while the m value is listed in the parenthesis. The calculated MW of the intact SNAP-tag protein is 19,694, while the calculated MW of the mono-DTT adduct is 19,829.

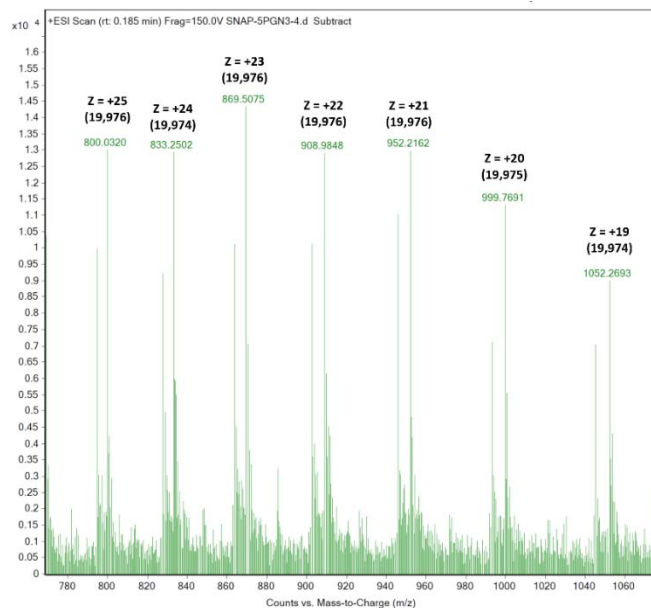

**Fig. S3** ESI-TOF-MS spectrum of the reaction mixture of SNAP-tag protein (purchased from NEB) and **5PG-AZIDE**. The charge (Z) is listed above each m/z peak, while the m value is listed in the parenthesis. The calculated MW of the conjugate of the intact SNAP-tag protein and **5PG-AZIDE** is 19,840, while the calculated MW of the conjugate of the mono-DTT adduct and **5PG-AZIDE** is 19,975.

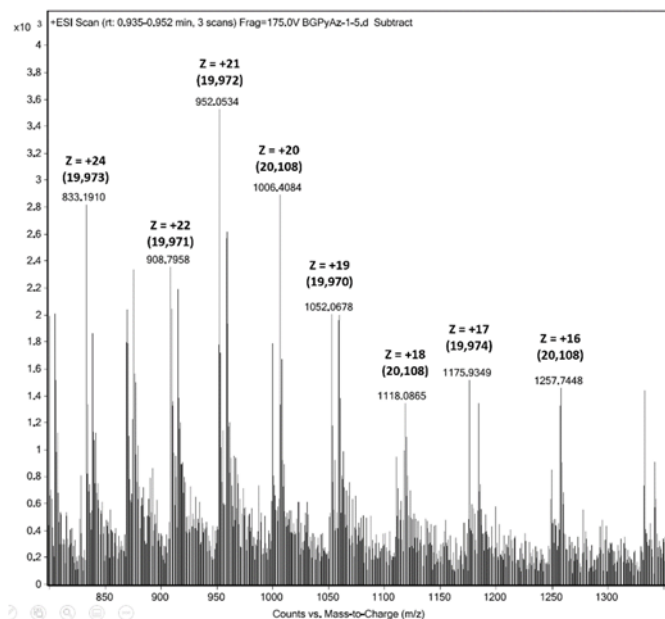

**Fig. S4** ESI-TOF-MS spectrum of the reaction mixture of SNAP-tag protein (purchased from NEB) and **BG-PyAz-1**. The charge (Z) is listed above each m/z peak, while the m value is listed in the parenthesis. The calculated MW of the conjugate of the intact SNAP-tag protein and **BG-PyAz-1** is 19,973, while the calculated MW of the conjugate of the mono-DTT adduct and **BG-PyAz-1** is 20,108.

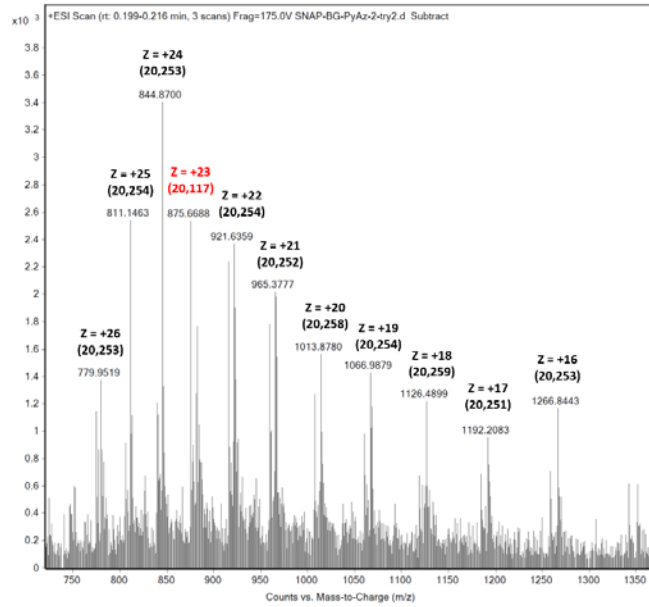

**Fig. S5** ESI-TOF-MS spectrum of the reaction mixture of SNAP-tag protein (purchased from NEB) and **BG-PyAz-2**. The charge (Z) is listed above each m/z peak, while the m value is listed in the parenthesis. The calculated MW of the conjugate of the intact SNAP-tag protein and **BG-PyAz-2** is 20,118 (marked in red), while the calculated MW of the conjugate of the mono-DTT adduct and **BG-PyAz-2** is 20,253.

### 3. SDS-PAGE

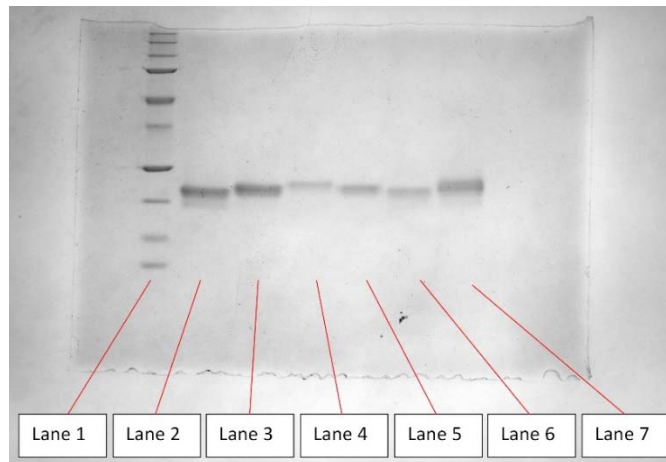

**Fig. S6** SDS-PAGE gel stained by Coomassie Blue G250. Lane 1 – ladder; Lane 2 – SNAP-tag only; Lane 3 – SNAP-tag and **BG-PyAz-2**, after SEC; Lane 4 – **BG-PyAz-2**-attached SNAP-tag and Sulfo-Cy5-alkyne treated with the CuAAC cocktail, after SEC; Lane 5 – **BG-PyAz-2**-attached SNAP-tag and Sulfo-Cy5-alkyne without the CuAAC cocktail, after SEC; Lane 6 – SNAP-tag and Sulfo-Cy5-alkyne treated with the CuAAC cocktail without **BG-PyAz-2**, after SEC; and Lane 7 - **BG-PyAz-2**-attached SNAP-tag and Sulfo-Cy5-alkyne treated with the CuAAC cocktail, without SEC separation.

#### 4. Additional images

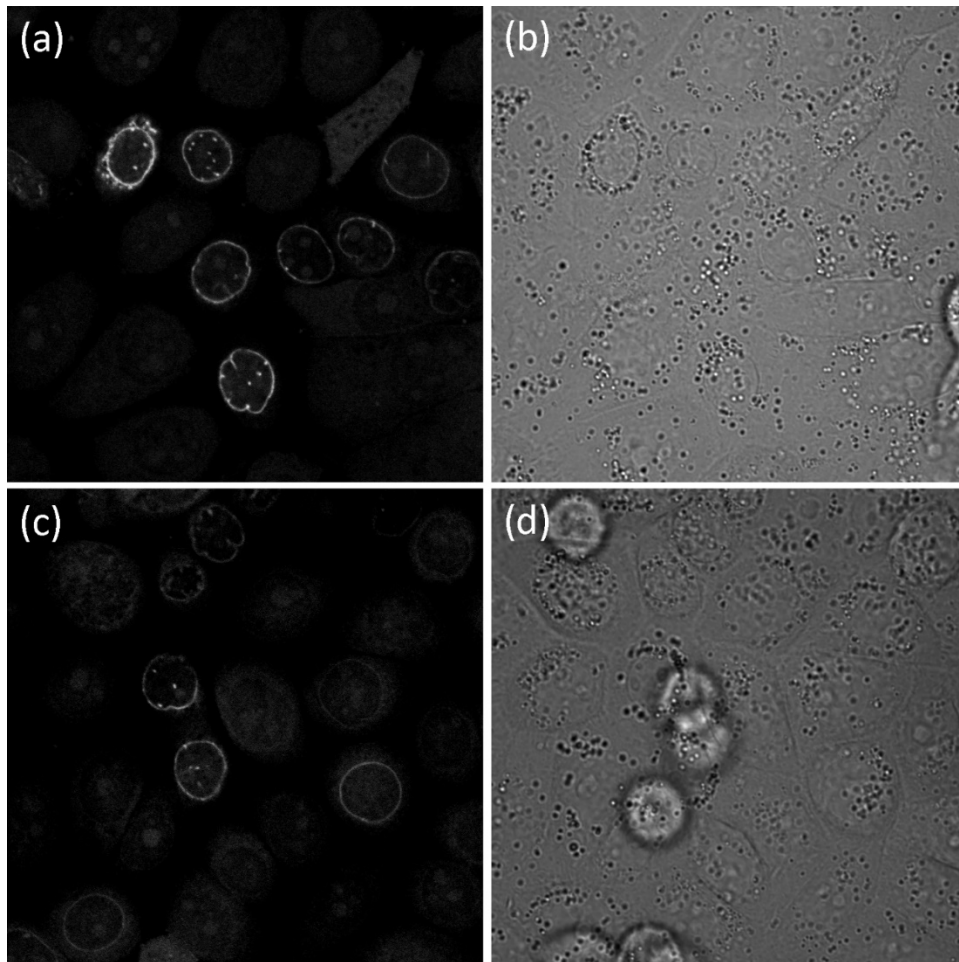

**Fig. S7** Fluorescence (a, c) and bright field (b, d) images of SNAP-LaminA-expressing HeLa cells labeled by **BG-PyAz-2** (a and b, 3  $\mu$ M) or **BG-AZIDE** (c and d, 3  $\mu$ M) for 1 h, followed by fixation (4% PFA) and permeabilization (0.2% Triton 100-X), and subsequent treatment with  $\text{CuSO}_4$  (40  $\mu$ M) and 5/6-TAMRA-PEG<sub>4</sub>-alkyne (6  $\mu$ M) as parts of the Click-iT reagent for 30 minutes at rt.  $\lambda_{\text{ex}} = 543$  nm, emission window 560–620 nm.

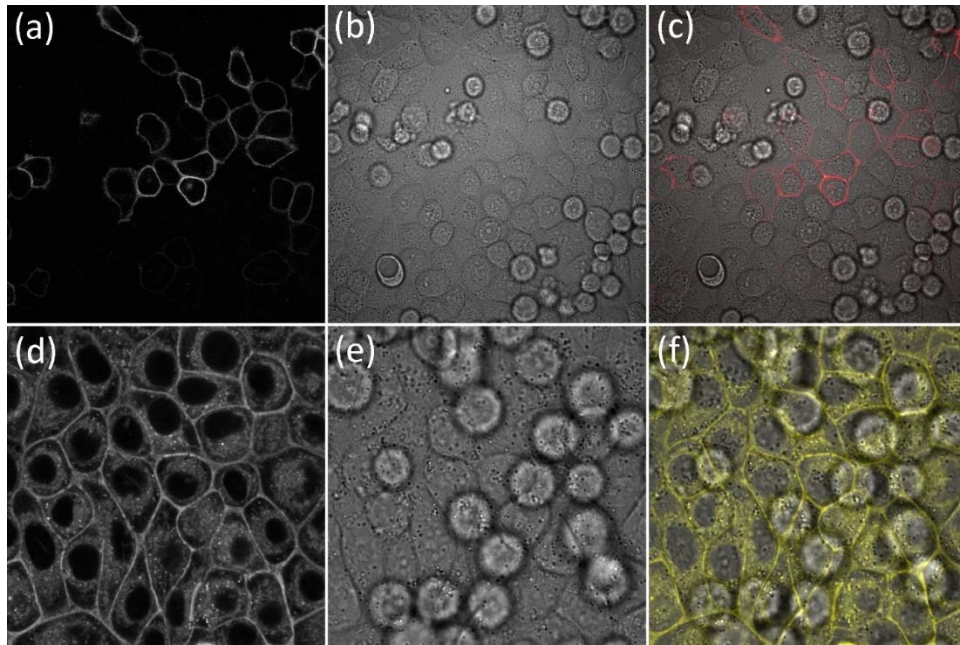

**Fig. S8** Fluorescence (left), bright field (middle), and overlay (right) images of pSNAP<sub>f</sub>-ADRB<sub>2</sub>-expressing HeLa cells labeled by the membrane impermeable SNAP-Surface-647 (top row, 1  $\mu$ M,  $\lambda_{ex}$  = 633 nm,  $\lambda_{em}$  > 650 nm) or the membrane permeable SNAP-Cell-TMR-Star (bottom row, 1  $\mu$ M,  $\lambda_{ex}$  = 543 nm, emission window 560-620 nm) for 30 minutes at 37 °C. SNAP-Cell-TMR-Star shows non-specific staining on cell membranes and inside cells.

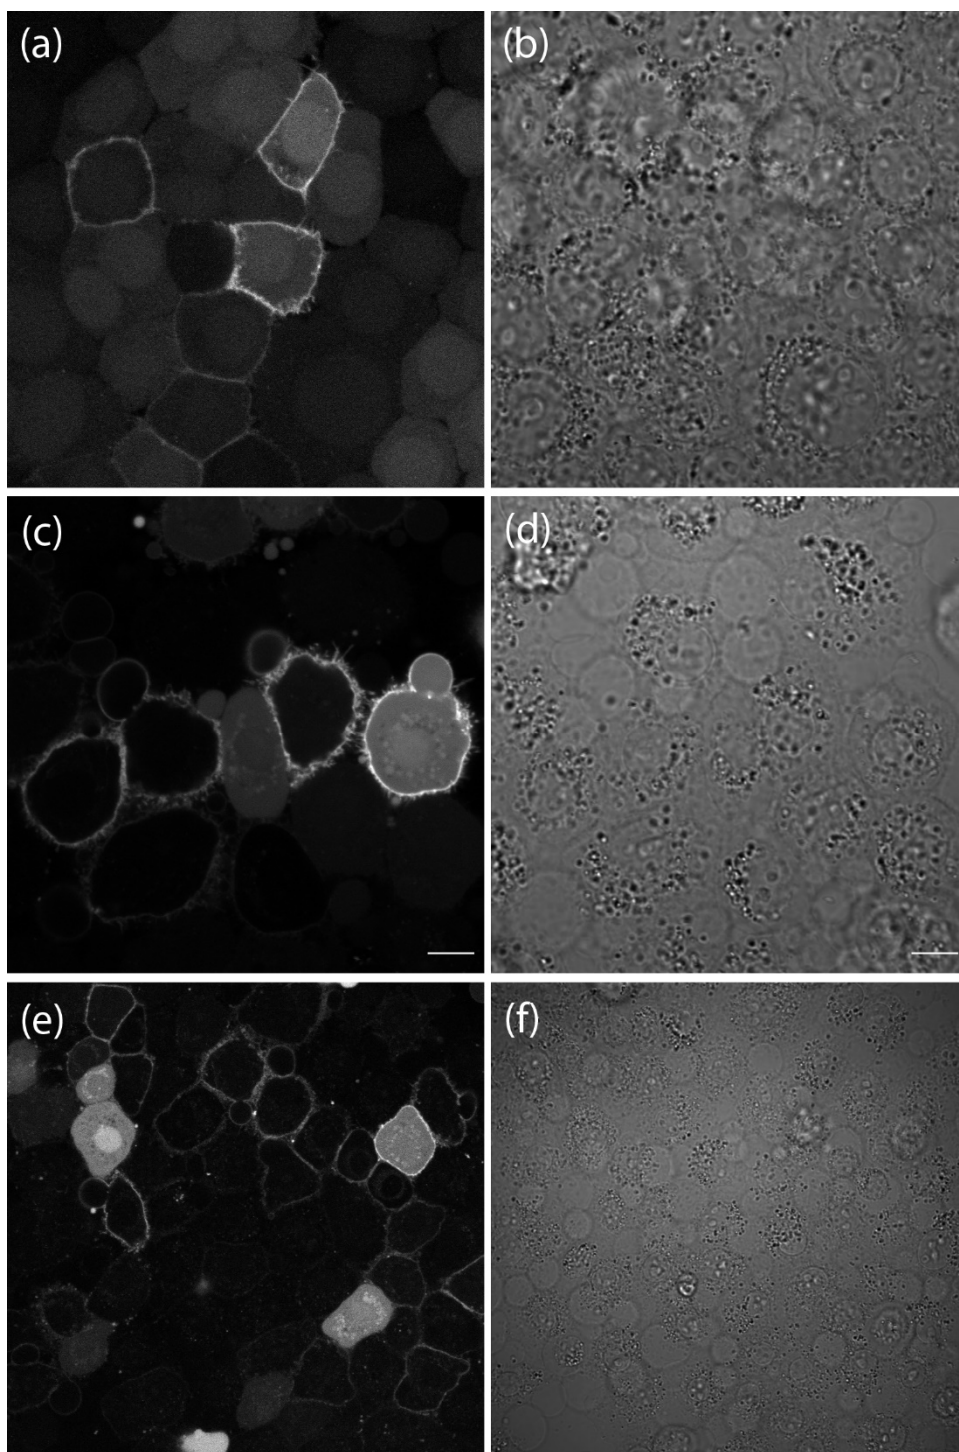

**Fig. S9** Fluorescence (a, c, e) and bright field (b, d, f) images of pSNAP<sub>r</sub>-ADRB<sub>2</sub>-expressing live HeLa S3 cells labeled by **5PG-AZIDE** (a and b, 3 μM), **BG-PyAz-1** (c and d, 3 μM), and **BG-AZIDE** (e and f, 3 μM) with an incubation time of 1 h, followed by labeling with sulfo-Cy5-alkyne (6 μM, 30 minutes at rt) using 40 μM CuSO<sub>4</sub> as part of the Click-iT reagent.  $\lambda_{\text{ex}} = 633 \text{ nm}$ ,  $\lambda_{\text{em}} > 650 \text{ nm}$ .

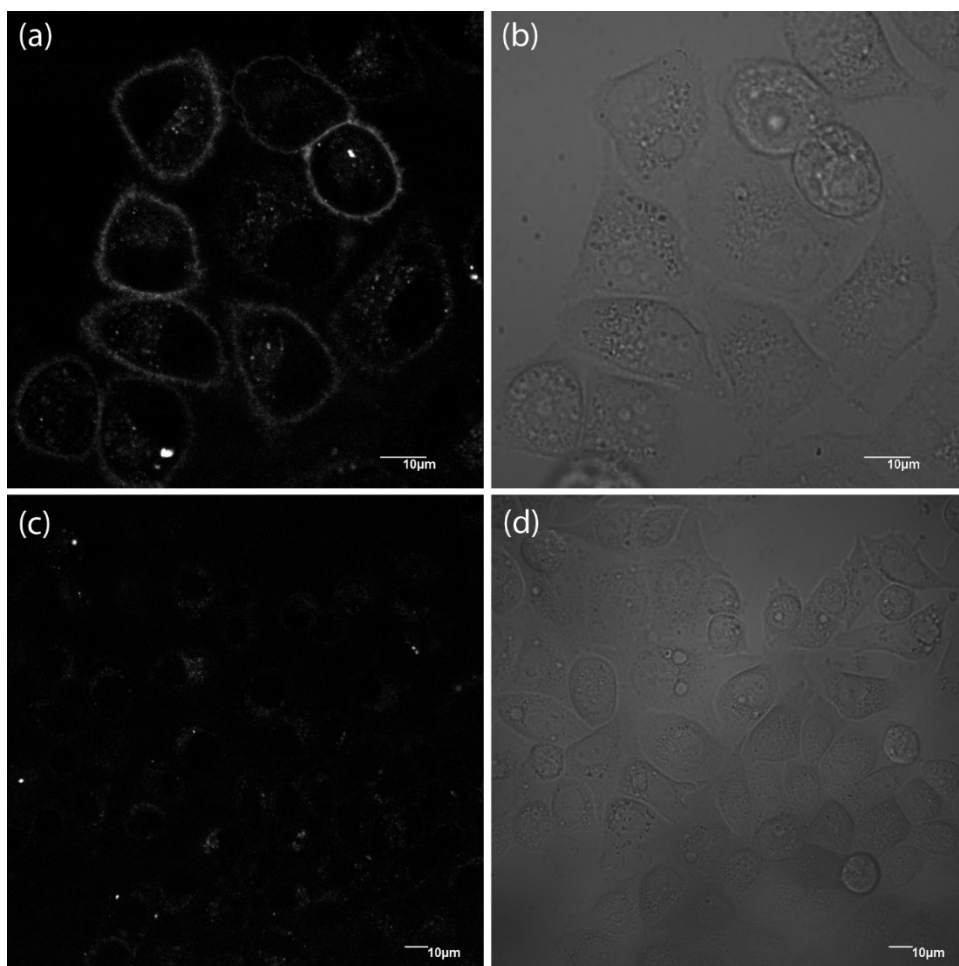

**Fig. S10** Fluorescence (a, c) and bright field (b, d) images of pSNAP<sub>r</sub>-ADRβ<sub>2</sub>-expressing HeLa cells labeled by **5PG-AZIDE** (a and b, 3 μM) or **BG-AZIDE** (c and d, 3 μM) for 30 min at 37 °C, followed by sulfo-Cy5-alkyne (6 μM) using a homemade CuAAC cocktail for 10 minutes at rt. [Cu(OAc)<sub>2</sub>] = 20 μM, [sodium ascorbate] = 0.5 mM, [THPTA] = 0.1 mM.  $\lambda_{\text{ex}} = 633 \text{ nm}$ ,  $\lambda_{\text{em}} > 650 \text{ nm}$ .



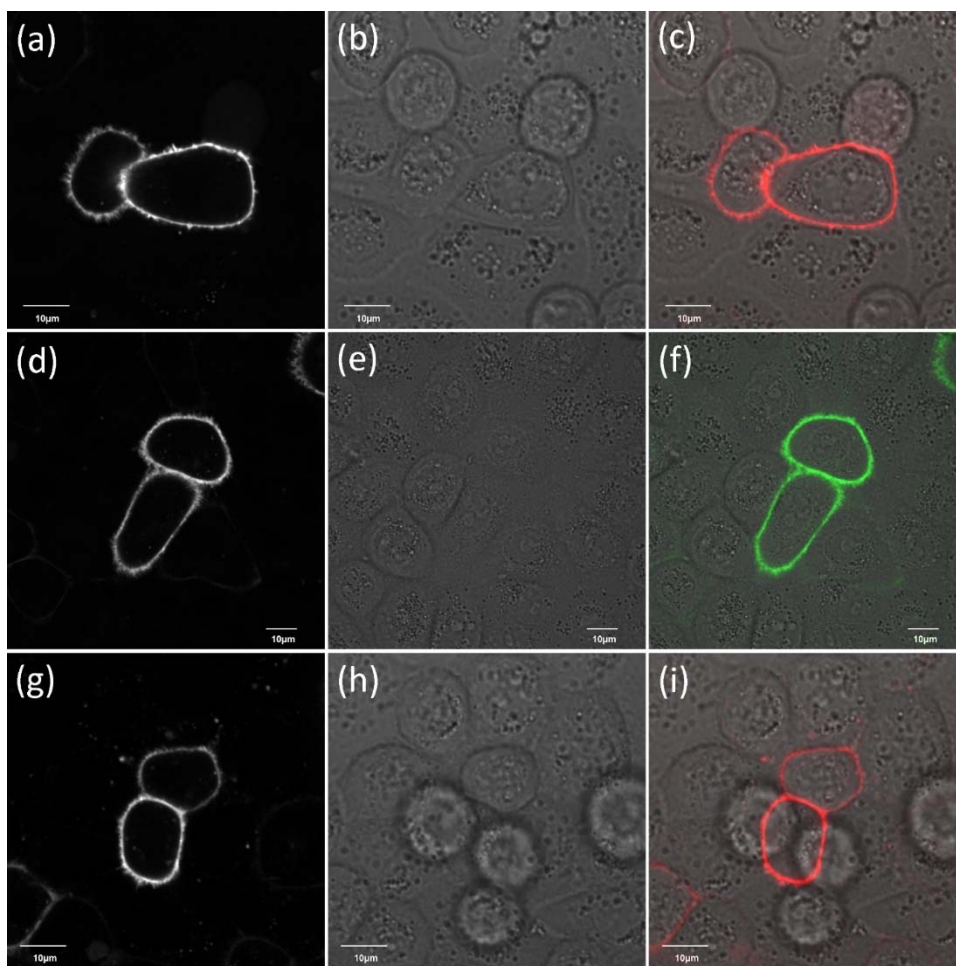

**Fig. S11** Fluorescence (left), DIC (middle), and overlay (right) images of pSNAP $\gamma$ -ADR $\beta$ 2-expressing live HeLa cells (selected clusters from the view field) labeled by **BG-PyAz-2** (a-f) at 3  $\mu$ M each for 30 min at 37  $^{\circ}$ C, followed by sulfo-Cy5-alkyne (a-c, 6  $\mu$ M) or 6-FAM-alkyne (d-f, 6  $\mu$ M) for 10 min at 37  $^{\circ}$ C using a homemade CuAAC cocktail in PBSA: [Cu(OAc) $_2$ ] = 20  $\mu$ M, [SA] = 0.5 mM, [THPTA] = 0.1 mM. Frames g-i were acquired from the experiment in which **BG-PyAz-2** (3  $\mu$ M) was mixed with the CuAAC cocktail for 30 minutes to produce the labeling media. The pseudo one-step labeling occurred over 10 mins at 37  $^{\circ}$ C. For Cy5,  $\lambda_{\text{ex}}$  = 633 nm,  $\lambda_{\text{em}}$  > 650 nm. For FAM,  $\lambda_{\text{ex}}$  = 488 nm,  $\lambda_{\text{em}}$  =500-600 nm.

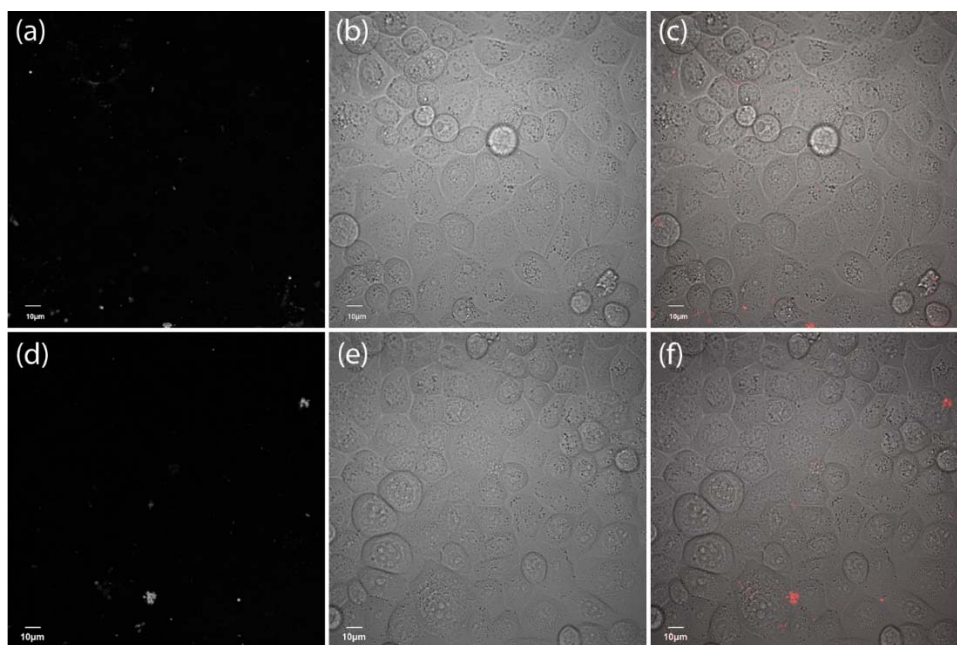

**Fig. S12** Fluorescence (left), DIC (middle), and overlay (right) images of pSNAP<sub>7</sub>-ADRβ<sub>2</sub>-expressing live HeLa cells incubated with DBCO-sulfo-Cy5 (a-c, 6 μM in PBSA) or sulfo-Cy5-alkyne (d-f, 6 μM in the homemade CuAAC cocktail) for 5 minutes at 37 °C. For d-f, [Cu(OAc)<sub>2</sub>] = 20 μM, [SA] = 0.5 mM, [THPTA] = 0.1 mM.  $\lambda_{\text{ex}}$  = 633 nm,  $\lambda_{\text{em}}$  > 650 nm.

## 5. Copies of $^1\text{H}$ and $^{13}\text{C}$ NMR spectra of new compounds

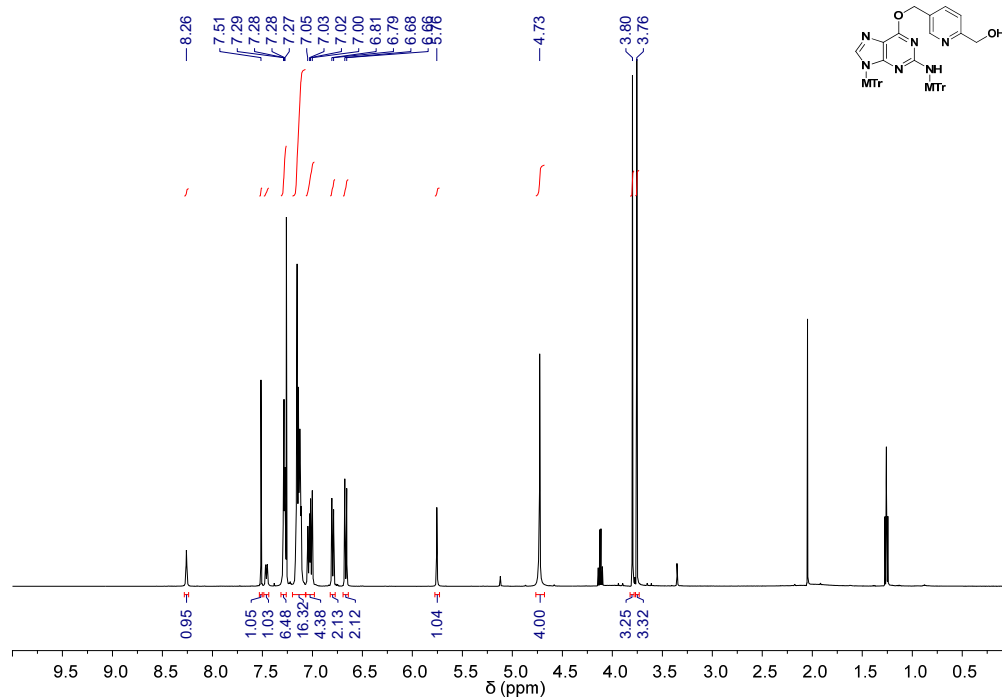

**Fig. S13**  $^1\text{H}$  NMR (500 MHz,  $\text{CDCl}_3$ ) of compound **2**.

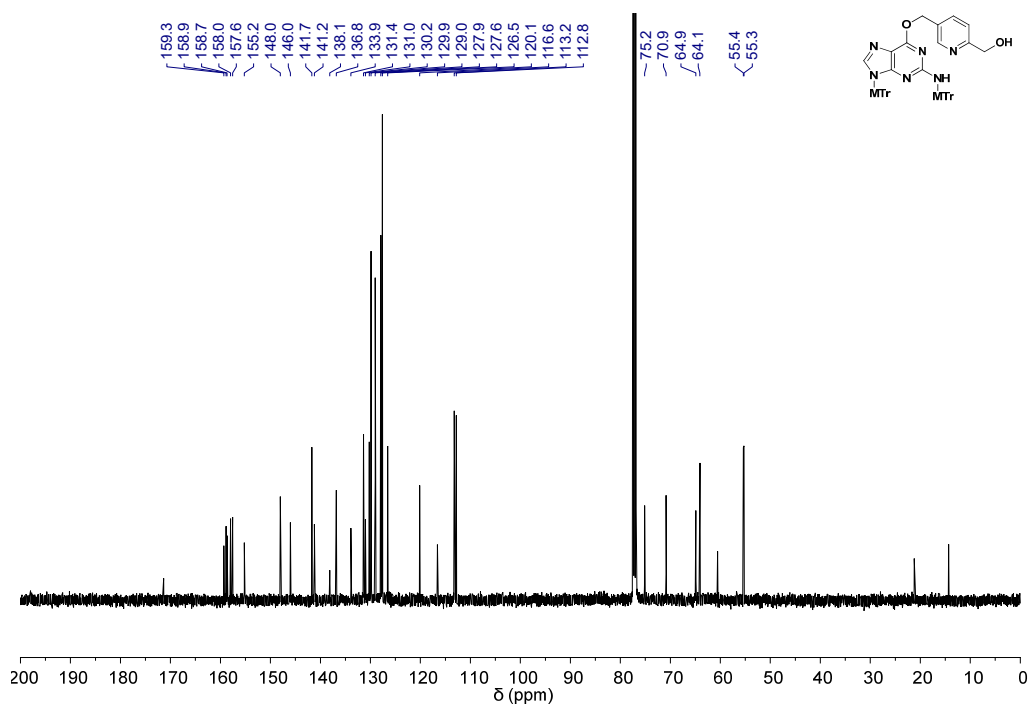

**Fig. S14**  $^{13}\text{C}$  NMR (125 MHz,  $\text{CDCl}_3$ ) of compound **2**. The peaks at 171, 60, 21, 14 ppm are attributed to residual ethyl acetate in the sample.

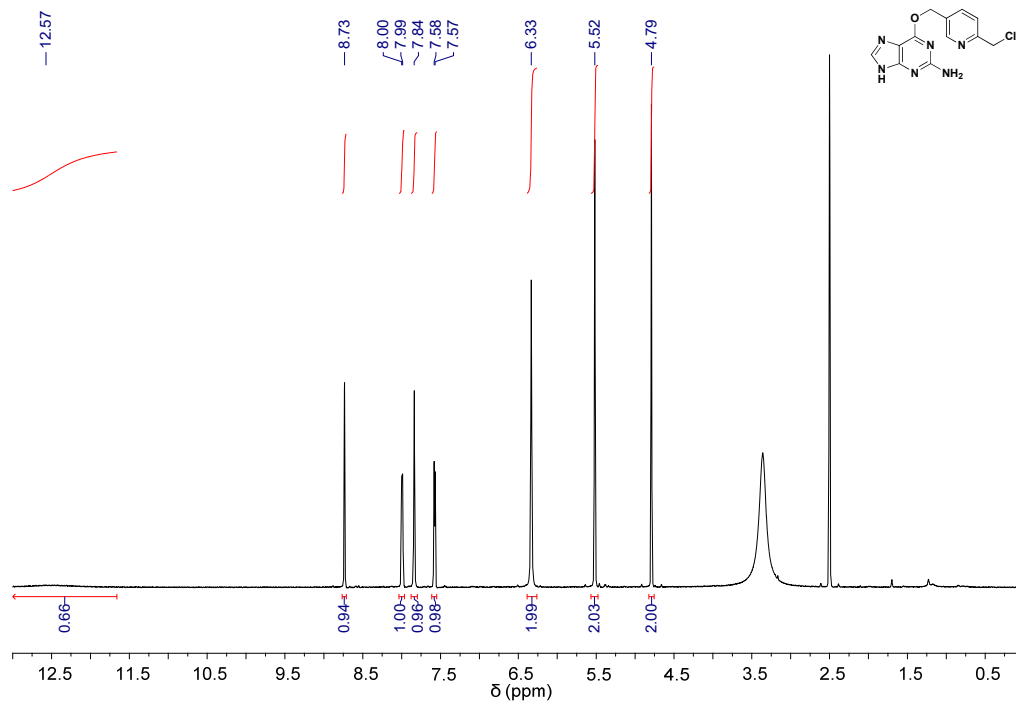

Fig. S15  $^1\text{H}$  NMR (600 MHz,  $\text{DMSO-d}_6$ ) of compound 3.

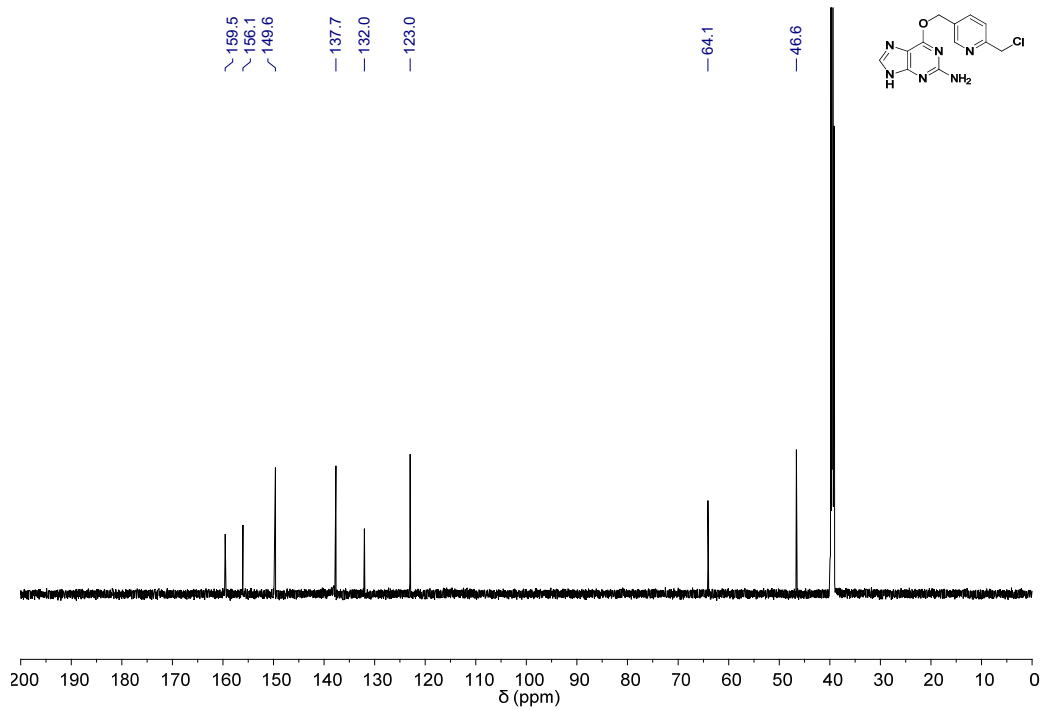

Fig. S16  $^{13}\text{C}$  NMR (150 MHz,  $\text{DMSO-d}_6$ ) of compound 3.

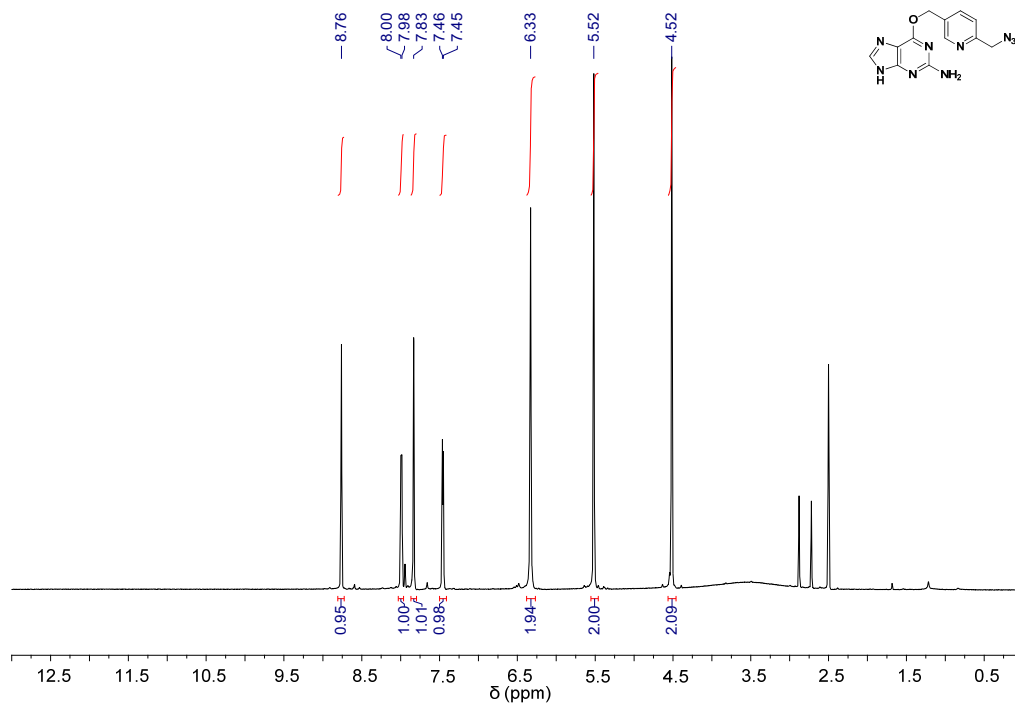

Fig. S17  $^1\text{H}$  NMR (600 MHz, DMSO- $d_6$ ) of 5PG-AZIDE.

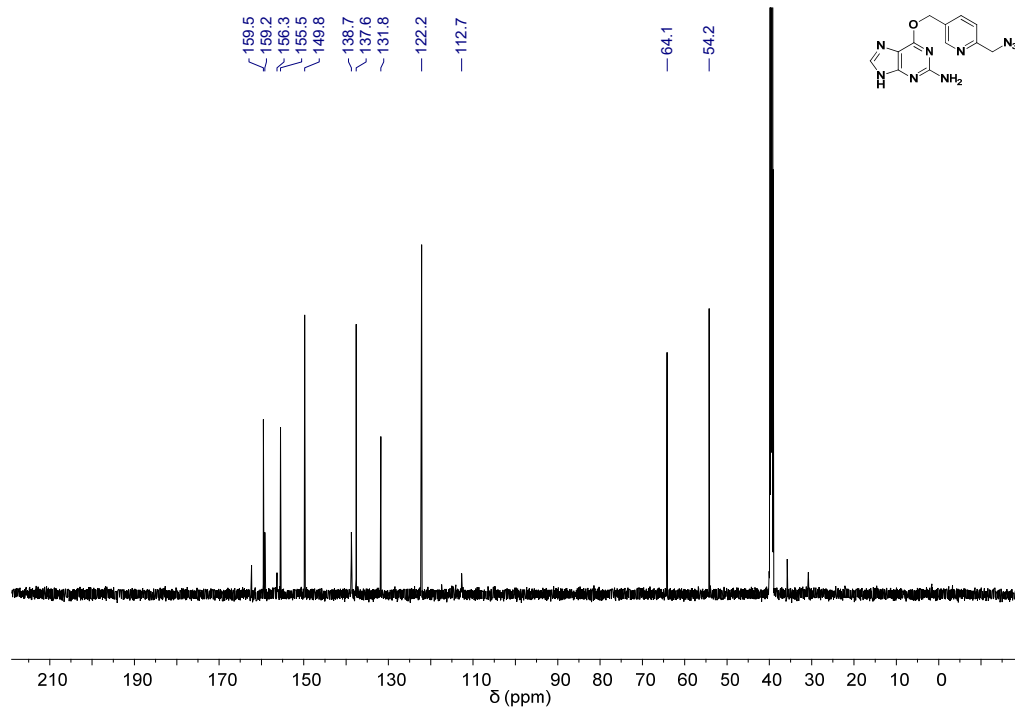

Fig. S18  $^{13}\text{C}$  NMR (150 MHz, DMSO- $d_6$ ) of 5PG-AZIDE.

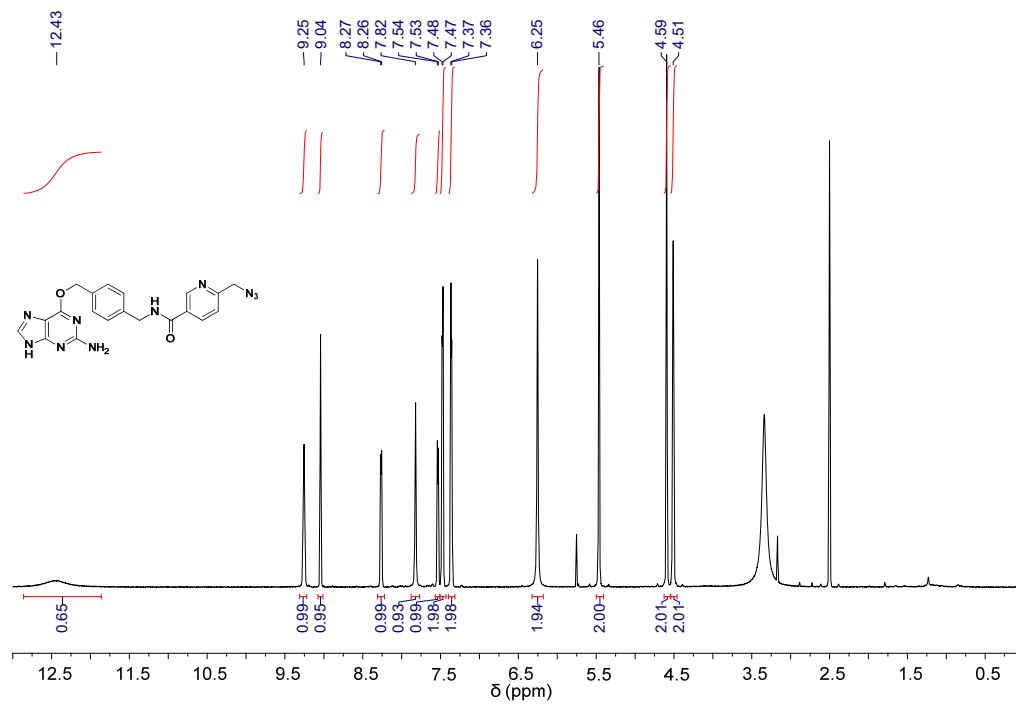

Fig. S19 <sup>1</sup>H NMR (600 MHz, DMSO-d<sub>6</sub>) of BG-PyAz-1.

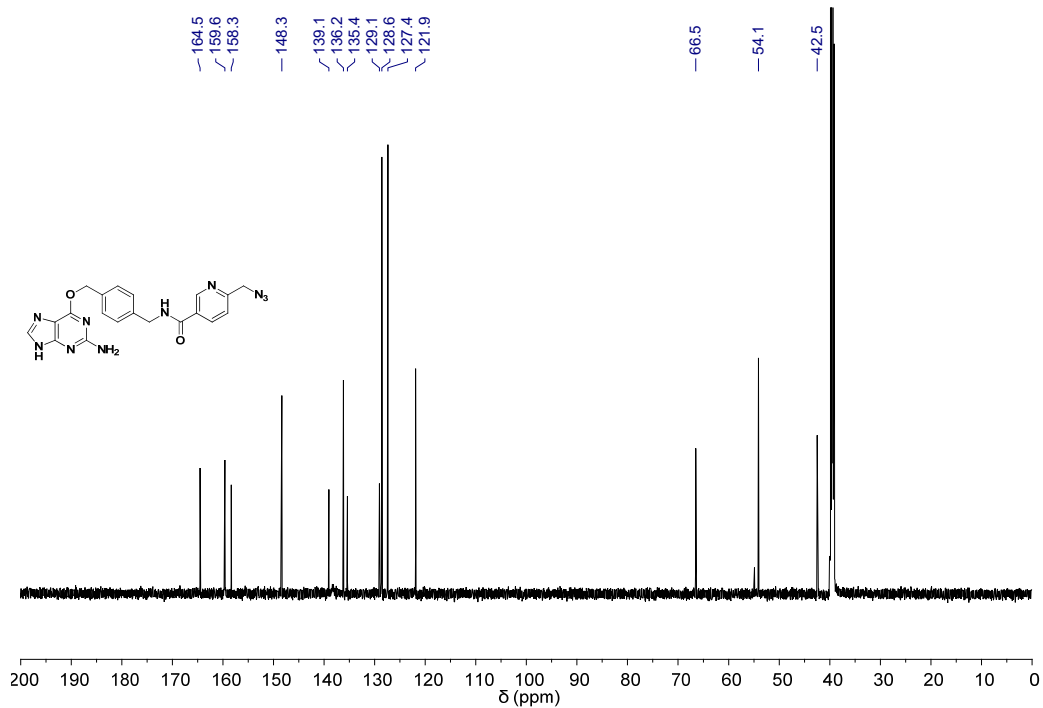

Fig. S20 <sup>13</sup>C NMR (150 MHz, DMSO-d<sub>6</sub>) of BG-PyAz-1.

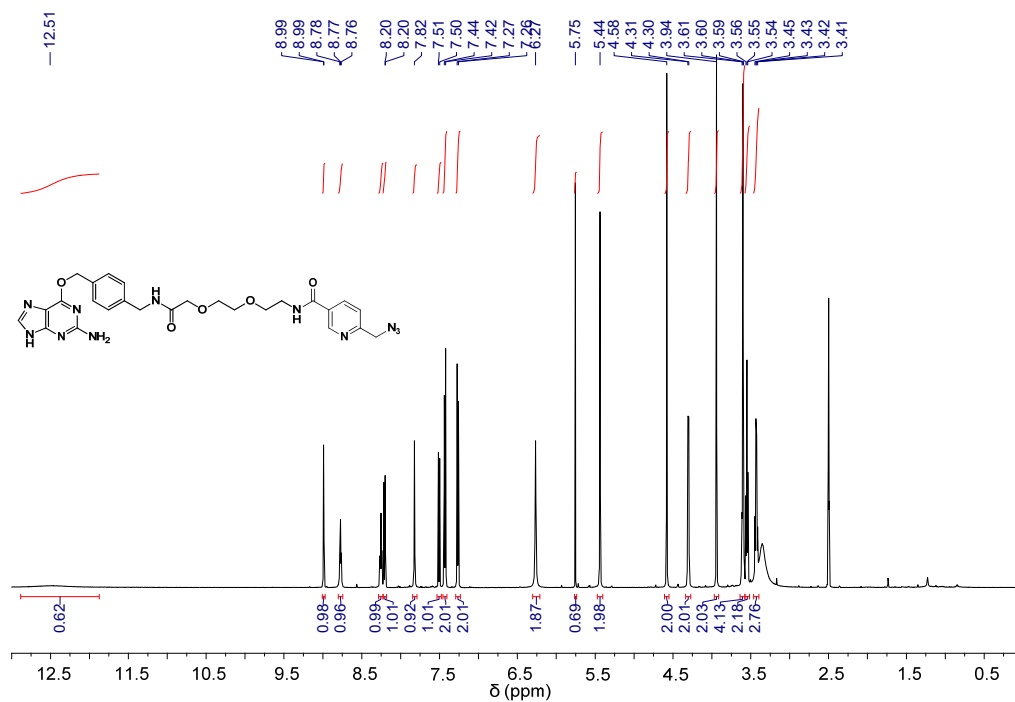

Fig. S21 <sup>1</sup>H NMR (500 MHz, DMSO-d<sub>6</sub>) of BG-PyAz-2.

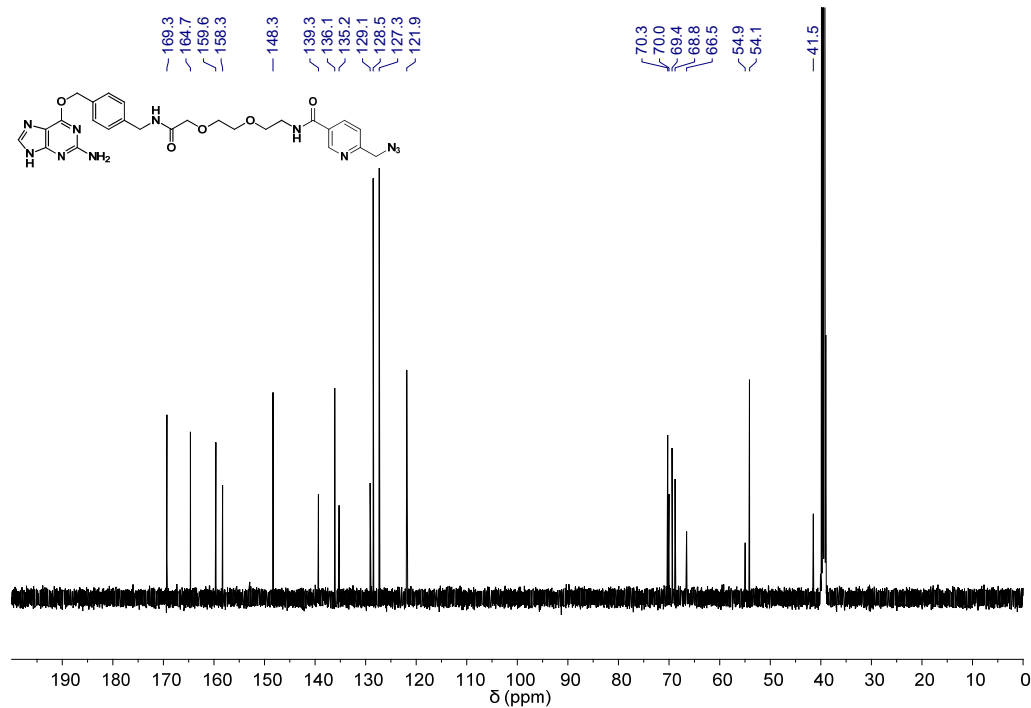

Fig. S22 <sup>13</sup>C NMR (125 MHz, DMSO-d<sub>6</sub>) of BG-PyAz-2.
